# Supplementary material for: Demographics as predictors of suicidal thoughts and behaviors: A meta-analysis
Source: PubMed Central journal article supplement (PMC5507259; doi:10.1371/journal.pone.0180793), 2017-07-10
Supplement: pone.0180793.s002.pdf [file pone.0180793.s002.pdf]

## Risk Factors - Suicide Ideation

| Study                         | Comparison         | Predictor                                             | Outcome          | Statistics for each study |             |             |         |         | Odds ratio and 95% CI |
|-------------------------------|--------------------|-------------------------------------------------------|------------------|---------------------------|-------------|-------------|---------|---------|-----------------------|
|                               |                    |                                                       |                  | Odds ratio                | Lower limit | Upper limit | Z-Value | p-Value |                       |
| Anderson et al. (2011)        | Home Placement     | Out of home placements                                | Suicide Ideation | 1.48                      | 0.86        | 2.55        | 1.41    | 0.16    |                       |
| Borges et al. (2008)          | Age                | Age (15-24 vs. 25-55)                                 | Suicide Ideation | 1.30                      | 1.00        | 1.69        | 1.94    | 0.05    |                       |
| Borges et al. (2008)          | Gender             | Female (vs. male)                                     | Suicide Ideation | 1.20                      | 0.90        | 1.60        | 1.24    | 0.21    |                       |
| Borges et al. (2008)          | Employment         | Homemaker (vs. employed)                              | Suicide Ideation | 1.00                      | 0.61        | 1.63        | 0.00    | 1.00    |                       |
| Borges et al. (2008)          | Education Level    | Low education (vs. very high)                         | Suicide Ideation | 1.00                      | 0.71        | 1.41        | 0.00    | 1.00    |                       |
| Borges et al. (2008)          | SES                | Poverty (vs. non)                                     | Suicide Ideation | 1.20                      | 0.90        | 1.60        | 1.24    | 0.21    |                       |
| Borges et al. (2008)          | Employment         | Unemployed (vs. employed)                             | Suicide Ideation | 2.70                      | 1.91        | 3.82        | 5.62    | 0.00    |                       |
| Bovasso (2001)                | Gender             | Female (vs. male)                                     | Suicide Ideation | 1.90                      | 1.11        | 3.25        | 2.35    | 0.02    |                       |
| Bovasso (2001)                | Race & Ethnicity   | White (vs. non-white)                                 | Suicide Ideation | 1.86                      | 1.09        | 3.16        | 2.29    | 0.02    |                       |
| Clarke et al. (2010)          | Age                | Age (mean comparison)                                 | Suicide Ideation | 1.49                      | 1.15        | 1.93        | 3.01    | 0.00    |                       |
| Clarke et al. (2010)          | Gender             | Female (vs. male)                                     | Suicide Ideation | 1.72                      | 1.27        | 2.33        | 3.54    | 0.00    |                       |
| Cohen et al. (2010)           | Gender             | Female (vs. male)                                     | Suicide Ideation | 2.30                      | 0.76        | 6.96        | 1.47    | 0.14    |                       |
| Dugas et al. (2012)           | Age                | Age (continuous)                                      | Suicide Ideation | 1.10                      | 0.69        | 1.76        | 0.40    | 0.69    |                       |
| Dugas et al. (2012)           | Gender             | Female (vs. male)                                     | Suicide Ideation | 2.00                      | 1.19        | 3.37        | 2.61    | 0.01    |                       |
| Dugas et al. (2012)           | Language           | French speaking                                       | Suicide Ideation | 1.00                      | 0.71        | 1.41        | 0.00    | 1.00    |                       |
| Dugas et al. (2012)           | Education Level    | Mother university education                           | Suicide Ideation | 1.10                      | 0.59        | 2.06        | 0.30    | 0.77    |                       |
| Garrison et al. (1991)        | Gender             | Female (vs. male)                                     | Suicide Ideation | 1.97                      | 1.05        | 3.69        | 2.11    | 0.03    |                       |
| Goodwin et al. (2005)         | Gender             | Female (vs. male)                                     | Suicide Ideation | 2.00                      | 1.11        | 3.62        | 2.29    | 0.02    |                       |
| Handley et al. (2012)         | Age                | Age (mean comparison)                                 | Suicide Ideation | 0.86                      | 0.67        | 1.11        | -1.16   | 0.25    |                       |
| Handley et al. (2012)         | SES                | Financial Status: comfortable (vs. prosperous)        | Suicide Ideation | 0.56                      | 0.07        | 4.39        | -0.55   | 0.58    |                       |
| Handley et al. (2012)         | SES                | Financial Status: just getting along (vs. prosperous) | Suicide Ideation | 2.00                      | 0.26        | 15.19       | 0.67    | 0.50    |                       |
| Handley et al. (2012)         | Employment         | Retired (vs. employed)                                | Suicide Ideation | 0.64                      | 0.29        | 1.41        | -1.11   | 0.27    |                       |
| Handley et al. (2012)         | Location           | Rural (vs. urban) australia                           | Suicide Ideation | 0.71                      | 0.32        | 1.59        | -0.83   | 0.40    |                       |
| Handley et al. (2012)         | Location           | Suburban (vs. urban) australia                        | Suicide Ideation | 1.50                      | 0.83        | 2.71        | 1.35    | 0.18    |                       |
| Handley et al. (2014)         | Age                | Age (continuous)                                      | Suicide Ideation | 1.00                      | 0.95        | 1.05        | 0.00    | 1.00    |                       |
| Handley et al. (2014)         | Gender             | Female (vs. male)                                     | Suicide Ideation | 0.85                      | 0.36        | 2.01        | -0.37   | 0.71    |                       |
| Handley et al. (2014)         | SES                | Income (high vs. very low)                            | Suicide Ideation | 0.25                      | 0.09        | 0.72        | -2.56   | 0.01    |                       |
| Handley et al. (2014)         | Employment         | Non-retired (vs. retired)                             | Suicide Ideation | 0.76                      | 0.44        | 1.32        | -0.98   | 0.33    |                       |
| Holma et al. (2014)           | Age                | Age (continuous)                                      | Suicide Ideation | 0.99                      | 0.96        | 1.02        | -0.65   | 0.52    |                       |
| Holma et al. (2014)           | Gender             | Female (vs. male)                                     | Suicide Ideation | 1.22                      | 0.66        | 2.25        | 0.64    | 0.53    |                       |
| Juon & Ensminger (1997-f)     | Family Types       | Raised by mother alone (vs. more)                     | Suicide Ideation | 1.21                      | 0.55        | 2.68        | 0.47    | 0.64    |                       |
| Juon & Ensminger (1997-m)     | Family Types       | Raised by mother alone (vs. others too)               | Suicide Ideation | 1.41                      | 0.66        | 3.01        | 0.89    | 0.37    |                       |
| Kuramoto et al. (2013)        | Age                | Age (mean comparison)                                 | Suicide Ideation | 1.28                      | 0.89        | 1.84        | 1.34    | 0.18    |                       |
| Kuramoto et al. (2013)        | Gender             | Female (vs. male)                                     | Suicide Ideation | 1.86                      | 1.24        | 2.77        | 3.03    | 0.00    |                       |
| Kuramoto et al. (2013)        | Living Situation   | Homeless                                              | Suicide Ideation | 1.39                      | 0.88        | 2.21        | 1.40    | 0.16    |                       |
| Kuramoto et al. (2013)        | Employment         | Unemployed                                            | Suicide Ideation | 1.36                      | 0.73        | 2.54        | 0.97    | 0.33    |                       |
| Mackelprang et al. (2014)     | Age                | Age (18-29 vs. 60+)                                   | Suicide Ideation | 2.31                      | 1.08        | 4.93        | 2.17    | 0.03    |                       |
| Mackelprang et al. (2014)     | Age                | Age (30-44 vs. 60+)                                   | Suicide Ideation | 3.06                      | 1.43        | 6.54        | 2.88    | 0.00    |                       |
| Mackelprang et al. (2014)     | Age                | Age (45-59 vs. 60+)                                   | Suicide Ideation | 3.07                      | 1.42        | 6.64        | 2.85    | 0.00    |                       |
| Mackelprang et al. (2014)     | Employment         | Disabled (vs. full time work)                         | Suicide Ideation | 1.40                      | 0.66        | 2.97        | 0.88    | 0.38    |                       |
| Mackelprang et al. (2014)     | Gender             | Female (vs. male)                                     | Suicide Ideation | 1.49                      | 0.96        | 2.30        | 1.80    | 0.07    |                       |
| Mackelprang et al. (2014)     | Education Level    | Low education (<HS vs. HS+)                           | Suicide Ideation | 2.38                      | 1.30        | 4.36        | 2.81    | 0.01    |                       |
| Mackelprang et al. (2014)     | SES                | Medicaid (vs. commercial/private insurance)           | Suicide Ideation | 1.83                      | 1.17        | 2.86        | 2.66    | 0.01    |                       |
| Mackelprang et al. (2014)     | SES                | Medicare (vs. commercial/private insurance)           | Suicide Ideation | 0.64                      | 0.33        | 1.25        | -1.31   | 0.19    |                       |
| Mackelprang et al. (2014)     | Employment         | Retired (vs. full time)                               | Suicide Ideation | 0.32                      | 0.13        | 0.76        | -2.57   | 0.01    |                       |
| Mackelprang et al. (2014)     | Employment         | Unemployed (vs. full time)                            | Suicide Ideation | 1.15                      | 0.59        | 2.25        | -0.41   | 0.68    |                       |
| Mackelprang et al. (2014)     | Employment         | Working part time (vs. full)                          | Suicide Ideation | 0.52                      | 0.25        | 1.09        | -1.73   | 0.08    |                       |
| McKeown et al. (1998)         | Gender             | Female (vs. male)                                     | Suicide Ideation | 3.22                      | 0.97        | 10.66       | 1.91    | 0.06    |                       |
| Nkansah-Amankra et al. (2012) | Gender             | Female (vs. male)                                     | Suicide Ideation | 0.79                      | 0.59        | 1.05        | -1.60   | 0.11    |                       |
| Nock & Banaji (2007)          | Age                | Age (continuous)                                      | Suicide Ideation | 0.99                      | 0.76        | 1.29        | -0.07   | 0.94    |                       |
| Perlis et al. (2007)          | Age                | Age (mean comparison)                                 | Suicide Ideation | 1.68                      | 1.02        | 2.77        | 2.03    | 0.04    |                       |
| Perlis et al. (2007)          | Gender             | Female (vs. male)                                     | Suicide Ideation | 2.10                      | 1.01        | 4.35        | 2.00    | 0.05    |                       |
| Ramchand et al. (2008)        | Age                | Age (continuous)                                      | Suicide Ideation | 1.12                      | 0.96        | 1.31        | 1.43    | 0.15    |                       |
| Ramchand et al. (2008)        | Gender             | Female (vs. male)                                     | Suicide Ideation | 1.40                      | 1.00        | 1.96        | 1.95    | 0.05    |                       |
| Reinherz et al. (1995-f)      | Family Types       | Late birth order (3rd or later)                       | Suicide Ideation | 2.44                      | 1.30        | 4.59        | 2.77    | 0.01    |                       |
| Reinherz et al. (1995-f)      | SES                | Low family SES (age 5)                                | Suicide Ideation | 1.05                      | 0.59        | 1.87        | 0.17    | 0.87    |                       |
| Reinherz et al. (1995-f)      | SES                | Low family SES (age 9)                                | Suicide Ideation | 1.44                      | 0.71        | 2.93        | 1.01    | 0.31    |                       |
| Reinherz et al. (1995-m)      | Family Types       | Late birth order (3rd or later)                       | Suicide Ideation | 1.48                      | 0.68        | 3.21        | 0.99    | 0.32    |                       |
| Reinherz et al. (1995-m)      | SES                | Low family SES (age 5)                                | Suicide Ideation | 0.59                      | 0.21        | 1.67        | -0.99   | 0.32    |                       |
| Reinherz et al. (1995-m)      | SES                | Low family SES (age 9)                                | Suicide Ideation | 0.76                      | 0.30        | 1.91        | -0.58   | 0.56    |                       |
| Thompson et al. (2007)        | Race & Ethnicity   | White (vs. other)                                     | Suicide Ideation | 0.79                      | 0.61        | 1.02        | -1.83   | 0.07    |                       |
| Tumer et al. (2012)           | Age                | Age (continuous)                                      | Suicide Ideation | 0.98                      | 0.84        | 1.15        | -0.25   | 0.80    |                       |
| Tumer et al. (2012)           | Family Types       | At least one non-bio parent                           | Suicide Ideation | 3.06                      | 1.56        | 6.02        | 3.24    | 0.00    |                       |
| Tumer et al. (2012)           | Gender             | Female (vs. male)                                     | Suicide Ideation | 1.72                      | 0.91        | 3.25        | 1.67    | 0.10    |                       |
| Tumer et al. (2012)           | Family Types       | Non-parent adult caregiver                            | Suicide Ideation | 0.14                      | 0.01        | 1.88        | -1.48   | 0.14    |                       |
| Tumer et al. (2012)           | Family Types       | Single parent                                         | Suicide Ideation | 1.00                      | 0.44        | 2.30        | 0.00    | 1.00    |                       |
| Wilcox et al. (2010)          | Gender             | Female (vs. male)                                     | Suicide Ideation | 1.63                      | 1.14        | 2.32        | 2.69    | 0.01    |                       |
| Wilcox et al. (2010)          | Sexual Orientation | Non-hetero sexual orientation                         | Suicide Ideation | 2.66                      | 1.59        | 4.47        | 3.72    | 0.00    |                       |
| Wong et al. (2011)            | Age                | Age (continuous)                                      | Suicide Ideation | 0.99                      | 0.65        | 1.51        | -0.05   | 0.96    |                       |
| Yaseen et al. (2013)          | Gender             | Female (vs. male)                                     | Suicide Ideation | 1.49                      | 1.15        | 1.93        | 3.02    | 0.00    |                       |
| Yen et al. (2009-2)           | Education Level    | Education                                             | Suicide Ideation | 0.92                      | 0.81        | 1.05        | -1.25   | 0.21    |                       |
| Yen et al. (2009-2)           | Gender             | Female (vs. male)                                     | Suicide Ideation | 0.87                      | 0.33        | 2.25        | -0.30   | 0.77    |                       |
|                               |                    |                                                       |                  | 1.25                      | 1.16        | 1.35        | 6.07    | 0.00    |                       |



## Risk Factors - Suicide Attempt

| Study                         | Comparison         | Predictor                                               | Outcome         | Statistics for each study |             |             |         |         |
|-------------------------------|--------------------|---------------------------------------------------------|-----------------|---------------------------|-------------|-------------|---------|---------|
|                               |                    |                                                         |                 | Odds ratio                | Lower limit | Upper limit | Z-Value | p-Value |
| Bakken & Vaglum (2007)        | Age                | Age (under 30 vs. over)                                 | Suicide Attempt | 2.36                      | 0.97        | 5.72        | 1.90    | 0.06    |
| Bakken & Vaglum (2007)        | Education Level    | Elementary school only (vs. more)                       | Suicide Attempt | 2.23                      | 0.98        | 5.07        | 1.92    | 0.06    |
| Bakken & Vaglum (2007)        | Gender             | Female (vs. male)                                       | Suicide Attempt | 1.21                      | 0.52        | 2.83        | 0.44    | 0.66    |
| Bakken & Vaglum (2007)        | Employment         | Unemployed                                              | Suicide Attempt | 1.23                      | 0.49        | 3.08        | 0.44    | 0.66    |
| Bhaskaran et al. (2014)       | Age                | Age 18-45 (vs. 46+)                                     | Suicide Attempt | 1.43                      | 0.89        | 2.29        | 1.49    | 0.14    |
| Bhaskaran et al. (2014)       | Gender             | Female (vs. male)                                       | Suicide Attempt | 1.38                      | 0.86        | 2.21        | 1.34    | 0.18    |
| Borges et al. (2008)          | Age                | Age (15-24 vs. 25-55)                                   | Suicide Attempt | 1.10                      | 0.50        | 2.41        | 0.24    | 0.81    |
| Borges et al. (2008)          | Gender             | Female (vs. male)                                       | Suicide Attempt | 1.00                      | 0.61        | 1.63        | 0.00    | 1.00    |
| Borges et al. (2008)          | Employment         | Homemaker (vs. employed)                                | Suicide Attempt | 0.80                      | 0.19        | 3.35        | -0.31   | 0.76    |
| Borges et al. (2008)          | Education Level    | Low education (vs. very high)                           | Suicide Attempt | 1.60                      | 0.52        | 4.96        | 0.81    | 0.42    |
| Borges et al. (2008)          | SES                | Poverty (vs. non)                                       | Suicide Attempt | 0.90                      | 0.31        | 2.60        | -0.19   | 0.85    |
| Borges et al. (2008)          | Employment         | Unemployed (vs. employed)                               | Suicide Attempt | 1.60                      | 0.70        | 3.68        | 1.11    | 0.27    |
| Breslau et al. (2012)         | Gender             | Female (vs. male)                                       | Suicide Attempt | 1.50                      | 0.75        | 2.99        | 1.15    | 0.25    |
| Chan et al. (2014)            | Age                | Age (continuous)                                        | Suicide Attempt | 0.39                      | 0.12        | 1.24        | -1.60   | 0.11    |
| Chan et al. (2014)            | Education Level    | Low education (vs. other)                               | Suicide Attempt | 1.34                      | 0.24        | 7.47        | 0.33    | 0.74    |
| Chan et al. (2014)            | Race & Ethnicity   | Malay ethnicity (vs. other)                             | Suicide Attempt | 1.84                      | 0.31        | 10.92       | 0.67    | 0.50    |
| Chan et al. (2014)            | Employment         | Unemployed (vs. employed)                               | Suicide Attempt | 1.16                      | 0.33        | 4.07        | 0.23    | 0.82    |
| Chen et al. (2013)            | Employment         | Unemployed                                              | Suicide Attempt | 1.59                      | 1.04        | 2.42        | 2.15    | 0.03    |
| Courtet et al. (2003)         | Age                | Age (mean comparison)                                   | Suicide Attempt | 1.66                      | 0.65        | 4.20        | 1.07    | 0.29    |
| Courtet et al. (2003)         | Gender             | Female (vs. male)                                       | Suicide Attempt | 1.09                      | 0.26        | 4.49        | 0.11    | 0.91    |
| Darke et al. (2005)           | Gender             | Female (vs. male)                                       | Suicide Attempt | 1.13                      | 0.60        | 2.13        | 0.39    | 0.70    |
| Fridell et al. (1996)         | Age                | Age (mean comparison)                                   | Suicide Attempt | 2.89                      | 0.92        | 9.05        | 1.83    | 0.07    |
| Fridell et al. (1996)         | Gender             | Female (vs. male)                                       | Suicide Attempt | 3.58                      | 0.82        | 15.53       | 1.70    | 0.09    |
| Fridell et al. (1996)         | Employment         | Unemployed                                              | Suicide Attempt | 1.23                      | 0.28        | 5.45        | 0.27    | 0.79    |
| Goldstein et al. (2012)       | Age                | Age (mean comparison)                                   | Suicide Attempt | 0.71                      | 0.45        | 1.12        | -1.47   | 0.14    |
| Goldstein et al. (2012)       | Race & Ethnicity   | White (vs. other)                                       | Suicide Attempt | 0.96                      | 0.50        | 1.83        | -0.12   | 0.90    |
| Goodwin et al. (2005)         | Gender             | Female (vs. male)                                       | Suicide Attempt | 2.40                      | 0.97        | 5.92        | 1.90    | 0.06    |
| Holma et al. (2010)           | Age                | Age (mean comparison)                                   | Suicide Attempt | 2.14                      | 1.13        | 4.05        | 2.34    | 0.02    |
| Holma et al. (2010)           | SES                | Low income (vs. higher)                                 | Suicide Attempt | 1.94                      | 0.95        | 3.96        | 1.83    | 0.07    |
| Holma et al. (2014)           | Age                | Age (continuous)                                        | Suicide Attempt | 0.94                      | 0.90        | 0.98        | -2.85   | 0.00    |
| Holma et al. (2014)           | Gender             | Female (vs. male)                                       | Suicide Attempt | 1.33                      | 0.60        | 2.95        | 0.70    | 0.48    |
| Horwitz et al. (2015)         | SES                | No insurance                                            | Suicide Attempt | 2.97                      | 1.44        | 6.09        | 2.96    | 0.00    |
| Ialongo et al. (2004)         | Family Types       | Bio mother present                                      | Suicide Attempt | 0.97                      | 0.51        | 1.84        | -0.09   | 0.93    |
| Juon & Ensminger (1997-f)     | Family Types       | Raised by mother alone (vs. others too)                 | Suicide Attempt | 0.69                      | 0.23        | 2.05        | -0.67   | 0.51    |
| Keilp et al. (2010)           | Age                | Age (mean comparison)                                   | Suicide Attempt | 2.18                      | 0.45        | 10.63       | 0.96    | 0.34    |
| Keilp et al. (2010)           | Gender             | Female (vs. male)                                       | Suicide Attempt | 1.20                      | 0.21        | 6.88        | 0.20    | 0.84    |
| Kidd et al. (2006)            | Gender             | Female (vs. male)                                       | Suicide Attempt | 1.34                      | 1.24        | 1.44        | 7.65    | 0.00    |
| Larsson et al. (2008)         | Family Types       | Parental divorce                                        | Suicide Attempt | 1.88                      | 1.13        | 3.13        | 2.42    | 0.02    |
| Levine et al. (2010)          | Gender             | Female (vs. male)                                       | Suicide Attempt | 1.52                      | 1.05        | 2.21        | 2.21    | 0.03    |
| Levine et al. (2010)          | Nationality        | Immigrant                                               | Suicide Attempt | 0.92                      | 0.55        | 1.54        | -0.32   | 0.75    |
| Levine et al. (2010)          | Family Types       | Native born father                                      | Suicide Attempt | 0.79                      | 0.52        | 1.21        | -1.09   | 0.27    |
| Lewinsohn et al. (2001-f)     | Family Types       | Teenage mother                                          | Suicide Attempt | 1.53                      | 0.43        | 5.45        | 0.66    | 0.51    |
| May et al. (2012)             | Age                | Age (mean comparison)                                   | Suicide Attempt | 0.93                      | 0.29        | 2.93        | -0.13   | 0.90    |
| May et al. (2012)             | Gender             | Female (vs. male)                                       | Suicide Attempt | 2.12                      | 0.40        | 11.28       | 0.88    | 0.38    |
| May et al. (2012)             | SES                | SES (cont decreasing)                                   | Suicide Attempt | 3.85                      | 1.18        | 12.56       | 2.24    | 0.03    |
| May et al. (2012)             | Race & Ethnicity   | White (vs. other)                                       | Suicide Attempt | 1.09                      | 0.10        | 11.53       | 0.07    | 0.94    |
| McKeown et al. (1998)         | Gender             | Female (vs. male)                                       | Suicide Attempt | 1.64                      | 0.22        | 12.38       | 0.48    | 0.63    |
| Mustanski & Liu (2013)        | Sexual Orientation | Age of same-sex attraction                              | Suicide Attempt | 0.50                      | 0.31        | 0.80        | -2.91   | 0.00    |
| Mustanski & Liu (2013)        | Sexual Orientation | Childhood gender non-conformity                         | Suicide Attempt | 1.61                      | 1.01        | 2.57        | 1.99    | 0.05    |
| Mustanski & Liu (2013)        | Gender             | Female (vs. male)                                       | Suicide Attempt | 1.72                      | 0.55        | 5.41        | 0.92    | 0.36    |
| Mustanski & Liu (2013)        | Gender             | Transgender (vs. others)                                | Suicide Attempt | 1.96                      | 0.40        | 9.51        | 0.84    | 0.40    |
| Nkansah-Amankra et al. (2012) | Gender             | Female (vs. male)                                       | Suicide Attempt | 2.63                      | 1.56        | 4.43        | 3.63    | 0.00    |
| O'Connor et al. (2013)        | Age                | Age (mean comparison)                                   | Suicide Attempt | 0.88                      | 0.31        | 2.47        | -0.24   | 0.81    |
| O'Connor et al. (2013)        | Gender             | Female (vs. male)                                       | Suicide Attempt | 0.80                      | 0.25        | 2.58        | -0.37   | 0.71    |
| Oquendo et al. (2007)         | Gender             | Female (vs. male)                                       | Suicide Attempt | 1.52                      | 1.01        | 2.28        | 2.01    | 0.04    |
| Rabinovitch et al. (2015)     | Age                | Age (continuous)                                        | Suicide Attempt | 0.36                      | 0.20        | 0.64        | -3.45   | 0.00    |
| Ramchand et al. (2008)        | Age                | Age (continuous)                                        | Suicide Attempt | 1.25                      | 0.85        | 1.83        | 1.15    | 0.25    |
| Ramchand et al. (2008)        | Gender             | Female (vs. male)                                       | Suicide Attempt | 1.40                      | 0.61        | 3.21        | 0.80    | 0.43    |
| Riihimaki et al. (2013)       | SES                | Welfare Benefits (vs. not)                              | Suicide Attempt | 5.28                      | 1.58        | 17.61       | 2.71    | 0.01    |
| Rodriguez-Cano et al. (2005)  | Gender             | Female (vs. male)                                       | Suicide Attempt | 3.73                      | 1.63        | 8.51        | 3.13    | 0.00    |
| Sadeh & McNeil (2013)         | Gender             | Female (vs. male)                                       | Suicide Attempt | 1.20                      | 0.92        | 1.56        | 1.36    | 0.17    |
| Sanchez-Gistau et al. (2013)  | Age                | Age (continuous)                                        | Suicide Attempt | 1.03                      | 0.69        | 1.54        | 0.14    | 0.89    |
| Sanchez-Gistau et al. (2013)  | Gender             | Female (vs. male)                                       | Suicide Attempt | 2.27                      | 0.59        | 8.69        | 1.20    | 0.23    |
| Sher et al. (2006)            | Age                | Age (mean comparison)                                   | Suicide Attempt | 4.24                      | 0.78        | 22.98       | 1.68    | 0.09    |
| Sher et al. (2006)            | Race & Ethnicity   | White (vs. other)                                       | Suicide Attempt | 4.33                      | 0.21        | 90.05       | 0.95    | 0.34    |
| Skeem et al. (2006)           | Age                | Age (18-25 vs. 25-40)                                   | Suicide Attempt | 1.15                      | 0.79        | 1.68        | 0.72    | 0.47    |
| Skeem et al. (2006)           | Gender             | Female (vs. male)                                       | Suicide Attempt | 1.53                      | 1.09        | 2.13        | 2.49    | 0.01    |
| Skeem et al. (2006)           | Living Situation   | Homeless                                                | Suicide Attempt | 1.30                      | 0.65        | 2.60        | 0.75    | 0.45    |
| Skeem et al. (2006)           | Employment         | Unemployed                                              | Suicide Attempt | 0.55                      | 0.39        | 0.77        | -3.41   | 0.00    |
| Skeem et al. (2006)           | Race & Ethnicity   | White (vs. other)                                       | Suicide Attempt | 1.20                      | 0.83        | 1.73        | 0.97    | 0.33    |
| Sokero et al. (2005)          | Age                | Age (mean comparison)                                   | Suicide Attempt | 1.59                      | 0.63        | 4.01        | 0.97    | 0.33    |
| Sokero et al. (2005)          | Gender             | Female (vs. male)                                       | Suicide Attempt | 1.17                      | 0.36        | 3.79        | 0.26    | 0.80    |
| Soloff & Chiapetta (2012b)    | SES                | Low SES (vs. higher)                                    | Suicide Attempt | 2.63                      | 1.05        | 6.58        | 2.07    | 0.04    |
| Stewart et al. (2001)         | Family Types       | Child welfare (vs. family placement)                    | Suicide Attempt | 1.48                      | 0.86        | 2.55        | 1.41    | 0.16    |
| Stewart et al. (2001)         | Gender             | Female (vs. male)                                       | Suicide Attempt | 1.02                      | 0.61        | 1.70        | 0.08    | 0.94    |
| Stewart et al. (2001)         | Family Types       | Foster placement                                        | Suicide Attempt | 1.84                      | 1.16        | 2.91        | 2.61    | 0.01    |
| Stewart et al. (2001)         | Age                | Late teen (vs. 7-14)                                    | Suicide Attempt | 1.71                      | 1.03        | 2.84        | 2.07    | 0.04    |
| Tejedor et al. (1999-1)       | Age                | Age (mean comparison)                                   | Suicide Attempt | 2.07                      | 1.03        | 4.14        | 2.05    | 0.04    |
| Thompson & Light (2011)       | Age                | Age (continuous)                                        | Suicide Attempt | 0.85                      | 0.75        | 0.97        | -2.48   | 0.01    |
| Thompson & Light (2011)       | Location           | Environment with easy gun availability                  | Suicide Attempt | 0.63                      | 0.40        | 1.00        | -1.96   | 0.05    |
| Thompson & Light (2011)       | Race & Ethnicity   | White (vs. other)                                       | Suicide Attempt | 1.27                      | 0.80        | 2.01        | 1.02    | 0.31    |
| Thompson et al. (2007)        | Race & Ethnicity   | White (vs. other)                                       | Suicide Attempt | 1.44                      | 0.89        | 2.32        | 1.49    | 0.14    |
| Tuisku et al. (in press-8)    | Age                | Age (continuous)                                        | Suicide Attempt | 1.10                      | 0.79        | 1.53        | 0.57    | 0.57    |
| Tuisku et al. (in press-8)    | Gender             | Female (vs. male)                                       | Suicide Attempt | 0.27                      | 0.09        | 0.80        | -2.36   | 0.02    |
| Valtonen et al. (2006)        | Age                | Age (mean comparison)                                   | Suicide Attempt | 3.18                      | 1.52        | 6.68        | 3.07    | 0.00    |
| Valtonen et al. (2006)        | Gender             | Female (vs. male)                                       | Suicide Attempt | 2.63                      | 1.11        | 6.20        | 2.21    | 0.03    |
| Wedig et al. (2012)           | Gender             | Female (vs. male)                                       | Suicide Attempt | 1.36                      | 0.92        | 2.01        | 1.55    | 0.12    |
| Whitlock et al. (2013)        | Sexual Orientation | Bisexual (vs. hetero)                                   | Suicide Attempt | 3.10                      | 1.60        | 6.00        | 3.36    | 0.00    |
| Whitlock et al. (2013)        | Sexual Orientation | Mostly gay/lesbian (vs. hetero)                         | Suicide Attempt | 5.10                      | 2.80        | 9.29        | 5.32    | 0.00    |
| Whitlock et al. (2013)        | Sexual Orientation | Mostly hetero (vs. hetero)                              | Suicide Attempt | 1.70                      | 1.02        | 2.84        | 2.02    | 0.04    |
| Wichstrom & Hegna (2003-f)    | Sexual Orientation | Same-sex sexual behavior                                | Suicide Attempt | 1.49                      | 1.24        | 1.78        | 4.31    | 0.00    |
| Wichstrom & Hegna (2003-m)    | Sexual Orientation | Same-sex sexual behavior                                | Suicide Attempt | 1.04                      | 0.85        | 1.27        | 0.36    | 0.72    |
| Wichstrom (2000)              | Age                | Age (continuous)                                        | Suicide Attempt | 1.39                      | 1.07        | 1.80        | 2.46    | 0.01    |
| Wichstrom (2000)              | Gender             | Female (vs. male)                                       | Suicide Attempt | 0.57                      | 0.44        | 0.74        | -4.26   | 0.00    |
| Wong & Maffini (2011)         | Family Types       | Acculturation (vs. not)                                 | Suicide Attempt | 1.08                      | 0.85        | 1.35        | 0.62    | 0.54    |
| Wong & Maffini (2011)         | Gender             | Female (vs. male)                                       | Suicide Attempt | 1.16                      | 0.92        | 1.46        | 1.24    | 0.22    |
| Yaseen et al. (2013)          | Gender             | Female (vs. male)                                       | Suicide Attempt | 1.51                      | 0.91        | 2.50        | 1.60    | 0.11    |
| Yen et al. (2009)             | Race & Ethnicity   | White (vs. other)                                       | Suicide Attempt | 1.21                      | 0.79        | 1.86        | 0.89    | 0.37    |
| Young et al. (2011)           | Family Types       | Birth spacing (2-5 years vs. less than 2)               | Suicide Attempt | 0.82                      | 0.45        | 1.49        | -0.65   | 0.52    |
| Young et al. (2011)           | Family Types       | Birth spacing (6+ years or singleton vs. less than two) | Suicide Attempt | 1.02                      | 0.60        | 1.73        | 0.07    | 0.94    |
| Young et al. (2011)           | Family Types       | Breastfeeding (less than 6 months vs. none)             | Suicide Attempt | 0.78                      | 0.43        | 1.42        | -0.81   | 0.42    |
| Young et al. (2011)           | Family Types       | Breastfeeding (more than six months vs. none)           | Suicide Attempt | 0.63                      | 0.34        | 1.16        | -1.48   | 0.14    |
| Young et al. (2011)           | Family Types       | Family size (3+ vs. 2)                                  | Suicide Attempt | 0.78                      | 0.45        | 1.35        | -0.89   | 0.37    |
| Young et al. (2011)           | Gender             | Female (vs. male)                                       | Suicide Attempt | 3.20                      | 1.93        | 5.30        | 4.51    | 0.00    |
| Young et al. (2011)           | Sexual Orientation | Gender conformist (vs. gender typical)                  | Suicide Attempt | 0.79                      | 0.34        | 1.82        | -0.55   | 0.58    |
| Young et al. (2011)           | Sexual Orientation | Gender nonconformist (vs. gender typical)               | Suicide Attempt | 1.89                      | 1.06        | 3.36        | 2.17    | 0.03    |
| Young et al. (2011)           | Employment         | Manual labor social class (vs. not)                     | Suicide Attempt | 1.39                      | 0.86        | 2.25        | 1.34    | 0.18    |
| Young et al. (2011)           | Family Types       | Maternal age (15-19 vs. 25-29)                          | Suicide Attempt | 1.84                      | 0.92        | 3.67        | 1.73    | 0.08    |
| Young et al. (2011)           | Family Types       | Maternal age (20-24 vs. 25-29)                          | Suicide Attempt | 1.25                      | 0.79        | 1.99        | 0.94    | 0.35    |
| Young et al. (2011)           | Family Types       | Maternal age (30-34 vs. 25-29)                          | Suicide Attempt | 0.82                      | 0.45        | 1.50        | -0.64   | 0.52    |
| Young et al. (2011)           | Family Types       | Maternal age (35-46 vs. 25-29)                          | Suicide Attempt | 1.09                      | 0.47        | 2.53        | 0.20    | 0.84    |
| Young et al. (2011)           | Parity             | Maternal parity (1+ vs. 0)                              | Suicide Attempt | 1.11                      | 0.70        | 1.76        | 0.44    | 0.66    |
| Young et al. (2011)           | Family Types       | Mixed family (vs. two parents)                          | Suicide Attempt | 3.21                      | 1.93        | 5.34        | 4.49    | 0.00    |
| Young et al. (2011)           | Family Types       | One parent (vs. two)                                    | Suicide Attempt | 1.48                      | 0.80        | 2.73        | 1.25    | 0.21    |
| Young et al. (2011)           | Location           | Rural services problems (Scotland)                      | Suicide Attempt | 1.09                      | 0.96        | 1.23        | 1.36    | 0.17    |
| Young et al. (2011)           | Sexual Orientation | Same-sex partner                                        | Suicide Attempt | 2.19                      | 0.68        | 7.06        | 1.31    | 0.19    |
| Young et al. (2011-3)         | Gender             | Female (vs. male)                                       | Suicide Attempt | 3.05                      | 1.94        | 4.79        | 4.85    | 0.00    |
| Young et al. (2011-3)         | Family Types       | No parent home (vs. 2)                                  | Suicide Attempt | 2.64                      | 1.58        | 4.42        | 3.70    | 0.00    |
| Young et al. (2011-3)         | Family Types       | One parent home (vs. 2)                                 | Suicide Attempt | 1.57                      | 0.93        | 2.66        | 1.68    | 0.09    |
| Zweig & Hinrichsen (1993)     | Age                | Age (mean comparison)                                   | Suicide Attempt | 1.05                      | 0.34        | 3.23        | 0.09    | 0.93    |
| Zweig & Hinrichsen (1993)     | Gender             | Female (vs. male)                                       | Suicide Attempt | 0.73                      | 0.20        | 2.67        | -0.47   | 0.64    |
| Zweig & Hinrichsen (1993)     | SES                | SES                                                     | Suicide Attempt | 0.28                      | 0.09        | 0.88        | -2.19   | 0.03    |
|                               |                    |                                                         |                 | 1.30                      | 1.20        | 1.41        | 6.66    | 0.00    |

Odds ratio and 95% CI



## Risk Factors - Suicide Death



## Protective Factors - Suicide Ideation

| Study                           | Comparison       | Predictor                                   | Outcome          | Statistics for each study |             |             |         |         | Odds ratio and 95% CI |
|---------------------------------|------------------|---------------------------------------------|------------------|---------------------------|-------------|-------------|---------|---------|-----------------------|
|                                 |                  |                                             |                  | Odds ratio                | Lower limit | Upper limit | Z-Value | p-Value |                       |
| Cogle et al. (2009)             | Age              | Age (continuous)                            | Suicide Ideation | 1.00                      | 0.98        | 1.02        | 0.00    | 1.00    |                       |
| Goodwin et al. (2005)           | Age              | Age (continuous)                            | Suicide Ideation | 0.98                      | 0.96        | 1.00        | -1.94   | 0.05    |                       |
| Goodwin et al. (2005)           | Race & Ethnicity | Black (vs. non-black)                       | Suicide Ideation | 3.00                      | 1.60        | 5.61        | 3.44    | 0.00    |                       |
| Lekka et al. (2006)             | Employment       | Employed                                    | Suicide Ideation | 0.78                      | 0.37        | 1.64        | -0.65   | 0.51    |                       |
| Lekka et al. (2006)             | Education Level  | Middle/high education (vs. low)             | Suicide Ideation | 0.79                      | 0.38        | 1.64        | -0.63   | 0.53    |                       |
| McKeown et al. (1998)           | Race & Ethnicity | Black (vs. other)                           | Suicide Ideation | 1.91                      | 0.40        | 9.14        | 0.81    | 0.42    |                       |
| McKeown et al. (1998)           | SES              | SES (increasing categories)                 | Suicide Ideation | 2.74                      | 0.66        | 11.34       | 1.39    | 0.16    |                       |
| Thompson et al. (2007)          | Age              | Age (12-14 vs. 15-17)                       | Suicide Ideation | 0.60                      | 0.47        | 0.76        | -4.17   | 0.00    |                       |
| Thompson et al. (2007)          | Gender           | Male (vs. female)                           | Suicide Ideation | 0.99                      | 0.80        | 1.22        | -0.09   | 0.93    |                       |
| Thompson et al. (2007)          | Location         | Urban (vs. rural)                           | Suicide Ideation | 1.01                      | 0.80        | 1.27        | 0.08    | 0.93    |                       |
| Tumer et al. (2012)             | Race & Ethnicity | Black (vs. white)                           | Suicide Ideation | 1.71                      | 0.70        | 4.16        | 1.18    | 0.24    |                       |
| Tumer et al. (2012)             | Race & Ethnicity | Hispanic (vs. white)                        | Suicide Ideation | 1.39                      | 0.64        | 3.04        | 0.82    | 0.41    |                       |
| Tumer et al. (2012)             | Race & Ethnicity | Non-black minority (vs. white)              | Suicide Ideation | 1.00                      | 0.21        | 4.77        | 0.00    | 1.00    |                       |
| Wilcox et al. (2010)            | SES              | High SES (vs. lower)                        | Suicide Ideation | 1.01                      | 0.68        | 1.50        | 0.06    | 0.95    |                       |
| Wilcox et al. (2010)            | Race & Ethnicity | Other ethnicity (vs. white)                 | Suicide Ideation | 1.65                      | 1.14        | 2.37        | 2.68    | 0.01    |                       |
| Mackelprang et al. (2014)       | Race & Ethnicity | Asian (vs. white)                           | Suicide Ideation | 1.33                      | 0.41        | 4.34        | 0.47    | 0.64    |                       |
| Mackelprang et al. (2014)       | Race & Ethnicity | Black (vs. white)                           | Suicide Ideation | 1.21                      | 0.48        | 3.06        | 0.40    | 0.69    |                       |
| Mackelprang et al. (2014)       | Race & Ethnicity | Hispanic (vs. white)                        | Suicide Ideation | 1.31                      | 0.48        | 3.58        | 0.53    | 0.60    |                       |
| Mackelprang et al. (2014)       | Race & Ethnicity | Other race (vs. white)                      | Suicide Ideation | 1.06                      | 0.19        | 5.83        | 0.07    | 0.95    |                       |
| Wong et al. (2011)              | Gender           | Male (vs. female)                           | Suicide Ideation | 0.88                      | 0.37        | 2.09        | -0.29   | 0.77    |                       |
| Cohen et al. (2010)             | Age              | Age (continuous)                            | Suicide Ideation | 0.98                      | 0.92        | 1.05        | -0.60   | 0.55    |                       |
| Cohen et al. (2010)             | Education Level  | College or Greater (vs high school or less) | Suicide Ideation | 0.82                      | 0.27        | 2.50        | -0.35   | 0.73    |                       |
| Cohen et al. (2010)             | Race & Ethnicity | Other ethnicity (vs. white)                 | Suicide Ideation | 0.78                      | 0.17        | 3.64        | -0.32   | 0.75    |                       |
| Cohen et al. (2010)             | Education Level  | Some College (vs. high school or less)      | Suicide Ideation | 0.84                      | 0.41        | 1.74        | -0.47   | 0.64    |                       |
| Kaplan et al. (2012-1)          | Gender           | Male (vs. female) in Schizophrenia patients | Suicide Ideation | 1.44                      | 0.34        | 6.05        | 0.50    | 0.62    |                       |
| Kaplan et al. (2012-2)          | Gender           | Male (vs. female) in depressed patients     | Suicide Ideation | 1.71                      | 0.42        | 7.04        | 0.75    | 0.45    |                       |
| Borges et al. (2008)            | Race & Ethnicity | Black (vs. other)                           | Suicide Ideation | 0.60                      | 0.40        | 0.90        | -2.47   | 0.01    |                       |
| Borges et al. (2008)            | Family Types     | Child 0-4 (vs. no child)                    | Suicide Ideation | 1.70                      | 1.20        | 2.40        | 3.00    | 0.00    |                       |
| Borges et al. (2008)            | Family Types     | Child 5-12 (vs. no child)                   | Suicide Ideation | 1.70                      | 1.39        | 2.08        | 5.13    | 0.00    |                       |
| Borges et al. (2008)            | Race & Ethnicity | Hispanic (vs. white)                        | Suicide Ideation | 1.00                      | 0.71        | 1.41        | 0.00    | 1.00    |                       |
| Borges et al. (2008)            | Race & Ethnicity | Other ethnicity (vs. white)                 | Suicide Ideation | 1.40                      | 0.71        | 2.75        | 0.98    | 0.33    |                       |
| Bovasso (2001)                  | Age              | Age (continuous)                            | Suicide Ideation | 0.98                      | 0.95        | 1.01        | -1.29   | 0.20    |                       |
| Handley et al. (2012)           | Gender           | Male (vs. female)                           | Suicide Ideation | 1.10                      | 0.65        | 1.87        | 0.35    | 0.72    |                       |
| Handley et al. (2014)           | Employment       | Pension (vs. no)                            | Suicide Ideation | 1.54                      | 0.90        | 2.64        | 1.57    | 0.12    |                       |
| Juon & Ensminger (1997-f)       | Employment       | Employed                                    | Suicide Ideation | 0.99                      | 0.44        | 2.24        | -0.02   | 0.98    |                       |
| Juon & Ensminger (1997-f)       | Family Types     | Mother's education                          | Suicide Ideation | 0.88                      | 0.39        | 1.98        | -0.31   | 0.76    |                       |
| Juon & Ensminger (1997-m)       | Employment       | Employed                                    | Suicide Ideation | 2.21                      | 1.03        | 4.74        | 2.04    | 0.04    |                       |
| Juon & Ensminger (1997-m)       | Family Types     | Mother's education                          | Suicide Ideation | 1.03                      | 0.47        | 2.24        | 0.07    | 0.94    |                       |
| Kuramoto et al. (2013)          | Education Level  | High school or greater education (vs. less) | Suicide Ideation | 0.80                      | 0.54        | 1.20        | -1.08   | 0.28    |                       |
| Miranda & Nolen-Hoeksema (2007) | Age              | Age (continuous)                            | Suicide Ideation | 1.01                      | 1.00        | 1.02        | 1.97    | 0.05    |                       |
| Miranda & Nolen-Hoeksema (2007) | Education Level  | Education (cont years)                      | Suicide Ideation | 0.95                      | 0.82        | 1.11        | -0.66   | 0.51    |                       |
| Miranda & Nolen-Hoeksema (2007) | Race & Ethnicity | Non-white vs white                          | Suicide Ideation | 0.75                      | 0.46        | 1.23        | -1.15   | 0.25    |                       |
| Ramchand et al. (2008)          | Race & Ethnicity | American Indian (vs. white)                 | Suicide Ideation | 1.42                      | 0.64        | 3.16        | 0.86    | 0.39    |                       |
| Ramchand et al. (2008)          | Race & Ethnicity | Black (vs. other)                           | Suicide Ideation | 0.24                      | 0.08        | 0.72        | -2.53   | 0.01    |                       |
| Ramchand et al. (2008)          | Race & Ethnicity | Hispanic (vs. white)                        | Suicide Ideation | 1.06                      | 0.64        | 1.75        | 0.23    | 0.82    |                       |
| Ramchand et al. (2008)          | Race & Ethnicity | Other ethnicity (vs. white)                 | Suicide Ideation | 1.06                      | 0.71        | 1.58        | 0.29    | 0.78    |                       |
| Tyssen et al. (2001)            | Age              | Age (continuous)                            | Suicide Ideation | 1.03                      | 0.87        | 1.21        | 0.35    | 0.73    |                       |
| Tyssen et al. (2001)            | Gender           | Male (vs. female)                           | Suicide Ideation | 1.50                      | 0.82        | 2.76        | 1.31    | 0.19    |                       |
| Yaseen et al. (2013)            | Age              | Age (30-44 vs. 18-29)                       | Suicide Ideation | 1.18                      | 0.88        | 1.59        | 1.10    | 0.27    |                       |
| Yaseen et al. (2013)            | Age              | Age (45-64 vs. 18-29)                       | Suicide Ideation | 1.31                      | 0.97        | 1.77        | 1.76    | 0.08    |                       |
| Yaseen et al. (2013)            | Age              | Age (65+ vs. 18-29)                         | Suicide Ideation | 1.01                      | 0.62        | 1.65        | 0.04    | 0.97    |                       |
| Yaseen et al. (2013)            | Race & Ethnicity | Black (vs. white)                           | Suicide Ideation | 0.97                      | 0.68        | 1.39        | -0.17   | 0.87    |                       |
| Yaseen et al. (2013)            | Education Level  | Education (very high vs. low)               | Suicide Ideation | 0.63                      | 0.41        | 0.97        | -2.10   | 0.04    |                       |
| Yaseen et al. (2013)            | Race & Ethnicity | Hispanic (vs. white)                        | Suicide Ideation | 0.90                      | 0.65        | 1.25        | -0.63   | 0.53    |                       |
| Yaseen et al. (2013)            | Race & Ethnicity | Other ethnicity (vs. white)                 | Suicide Ideation | 0.70                      | 0.41        | 1.19        | -1.31   | 0.19    |                       |
| Yaseen et al. (2013)            | Location         | Suburban (vs. rural)                        | Suicide Ideation | 0.91                      | 0.67        | 1.23        | -0.61   | 0.54    |                       |
| Yaseen et al. (2013)            | Location         | Urban (vs. rural)                           | Suicide Ideation | 1.13                      | 0.82        | 1.55        | 0.75    | 0.45    |                       |
|                                 |                  |                                             |                  | 1.01                      | 0.98        | 1.04        | 0.52    | 0.60    |                       |



## Protective Factors - Suicide Attempt

| Study                        | Comparison       | Predictor                                   | Outcome         | Statistics for each study |             |             |         |         | Odds ratio and 95% CI |
|------------------------------|------------------|---------------------------------------------|-----------------|---------------------------|-------------|-------------|---------|---------|-----------------------|
|                              |                  |                                             |                 | Odds ratio                | Lower limit | Upper limit | Z-Value | p-Value |                       |
| Addington et al. (2004)      | Gender           | Male (vs. female)                           | Suicide Attempt | 0.68                      | 0.15        | 3.11        | -0.50   | 0.62    |                       |
| Bolton et al. (2010)         | Age              | Age (30-44 vs. 18-29)                       | Suicide Attempt | 1.12                      | 0.64        | 1.96        | 0.40    | 0.69    |                       |
| Bolton et al. (2010)         | Age              | Age (45+ vs. 18-29)                         | Suicide Attempt | 0.49                      | 0.26        | 0.94        | -2.14   | 0.03    |                       |
| Bolton et al. (2010)         | SES              | High income (vs. very low)                  | Suicide Attempt | 0.44                      | 0.20        | 0.98        | -2.01   | 0.04    |                       |
| Borges et al. (2008)         | Race & Ethnicity | Black (vs. other)                           | Suicide Attempt | 1.70                      | 0.78        | 3.71        | 1.33    | 0.18    |                       |
| Borges et al. (2008)         | Family Types     | Child 0-4 (vs. no child)                    | Suicide Attempt | 1.10                      | 0.48        | 2.51        | 0.23    | 0.82    |                       |
| Borges et al. (2008)         | Family Types     | Child 5-12 (vs. no child)                   | Suicide Attempt | 0.40                      | 0.10        | 1.55        | -1.33   | 0.18    |                       |
| Borges et al. (2008)         | Race & Ethnicity | Hispanic (vs. white)                        | Suicide Attempt | 0.70                      | 0.20        | 2.47        | -0.55   | 0.58    |                       |
| Borges et al. (2008)         | Race & Ethnicity | Other ethnicity (vs. white)                 | Suicide Attempt | 0.80                      | 0.50        | 1.29        | -0.92   | 0.36    |                       |
| Britton & Connor (2010)      | Age              | Age (continuous)                            | Suicide Attempt | 0.96                      | 0.93        | 0.99        | -2.56   | 0.01    |                       |
| Britton & Connor (2010)      | Gender           | Male (vs. female)                           | Suicide Attempt | 0.38                      | 0.24        | 0.61        | -4.07   | 0.00    |                       |
| Britton & Connor (2010)      | Race & Ethnicity | Other ethnicity (vs. white)                 | Suicide Attempt | 0.50                      | 0.32        | 0.79        | -3.01   | 0.00    |                       |
| Chan et al. (2014)           | Gender           | Male (vs. female)                           | Suicide Attempt | 1.12                      | 0.32        | 3.96        | 0.18    | 0.86    |                       |
| Chen et al. (2013)           | Gender           | Male (vs. female)                           | Suicide Attempt | 0.80                      | 0.52        | 1.22        | -1.03   | 0.30    |                       |
| Darke et al. (2005)          | Education Level  | Education (cont years)                      | Suicide Attempt | 1.92                      | 1.10        | 3.35        | 2.29    | 0.02    |                       |
| Dieserud et al. (2003)       | Age              | Age (continuous)                            | Suicide Attempt | 1.00                      | 0.99        | 1.01        | 0.00    | 1.00    |                       |
| Goldstein et al. (2012)      | Family Types     | Living with both bio parents                | Suicide Attempt | 0.88                      | 0.53        | 1.46        | -0.51   | 0.61    |                       |
| Goldstein et al. (2012)      | Gender           | Male (vs. female)                           | Suicide Attempt | 0.57                      | 0.34        | 0.94        | -2.19   | 0.03    |                       |
| Goldstein et al. (2012)      | SES              | SES (cont increasing)                       | Suicide Attempt | 1.00                      | 0.64        | 1.57        | 0.00    | 1.00    |                       |
| Goodwin et al. (2005)        | Age              | Age (continuous)                            | Suicide Attempt | 0.98                      | 0.96        | 1.00        | -1.94   | 0.05    |                       |
| Goodwin et al. (2005)        | Race & Ethnicity | Black (vs. non-black)                       | Suicide Attempt | 2.40                      | 0.80        | 7.20        | 1.56    | 0.12    |                       |
| Greer & Bagley (1971)        | Gender           | Male (vs. female)                           | Suicide Attempt | 2.00                      | 1.07        | 3.75        | 2.16    | 0.03    |                       |
| Holma et al. (2010)          | Employment       | Employed                                    | Suicide Attempt | 0.79                      | 0.38        | 1.62        | -0.65   | 0.51    |                       |
| Holma et al. (2010)          | Gender           | Male (vs. female)                           | Suicide Attempt | 0.80                      | 0.34        | 1.86        | -0.52   | 0.61    |                       |
| Holma et al. (2010)          | Education Level  | Professional education (vs. not)            | Suicide Attempt | 2.54                      | 1.24        | 5.22        | 2.54    | 0.01    |                       |
| Juon & Ensminger (1997-f)    | Employment       | Employed                                    | Suicide Attempt | 1.01                      | 0.36        | 2.85        | 0.02    | 0.99    |                       |
| Juon & Ensminger (1997-f)    | Family Types     | Mother's education                          | Suicide Attempt | 1.28                      | 0.47        | 3.50        | 0.48    | 0.63    |                       |
| Juon & Ensminger (1997-m)    | Family Types     | Mother's education                          | Suicide Attempt | 1.54                      | 0.38        | 6.28        | 0.60    | 0.55    |                       |
| Kaplan et al. (2012-1)       | Gender           | Male (vs. female) in Schizophrenia patients | Suicide Attempt | 0.50                      | 0.03        | 8.38        | -0.48   | 0.63    |                       |
| Kaplan et al. (2012-2)       | Gender           | Male (vs. female) in depressed patients     | Suicide Attempt | 0.27                      | 0.01        | 5.36        | -0.86   | 0.39    |                       |
| Keilp et al. (2010)          | Education Level  | Education (cont years)                      | Suicide Attempt | 1.69                      | 0.35        | 8.21        | 0.65    | 0.51    |                       |
| Larsson et al. (2008)        | Family Types     | Living with bio parents                     | Suicide Attempt | 0.53                      | 0.32        | 0.89        | -2.42   | 0.02    |                       |
| Levine et al. (2010)         | Education Level  | BA graduation (vs. less)                    | Suicide Attempt | 0.06                      | 0.01        | 0.39        | -2.93   | 0.00    |                       |
| Levine et al. (2010)         | Education Level  | Pre-morbid education (cont years)           | Suicide Attempt | 0.56                      | 0.32        | 0.98        | -2.03   | 0.04    |                       |
| Lewinsohn et al. (2001-f)    | Family Types     | Parental education (cont years) for females | Suicide Attempt | 2.26                      | 0.81        | 6.32        | 1.55    | 0.12    |                       |
| Lewinsohn et al. (2001-m)    | Family Types     | Parental education (cont years) for males   | Suicide Attempt | 0.76                      | 0.22        | 2.64        | -0.43   | 0.67    |                       |
| May et al. (2012)            | Education Level  | Education (cont years)                      | Suicide Attempt | 0.67                      | 0.21        | 2.14        | -0.67   | 0.50    |                       |
| McKeown et al. (1998)        | Race & Ethnicity | Black (vs. other)                           | Suicide Attempt | 0.29                      | 0.04        | 2.06        | -1.24   | 0.22    |                       |
| McKeown et al. (1998)        | SES              | SES (increasing categories)                 | Suicide Attempt | 1.28                      | 0.17        | 9.71        | 0.24    | 0.81    |                       |
| Mustanski & Liu (2013)       | Gender           | Male (vs. female)                           | Suicide Attempt | 0.39                      | 0.11        | 1.47        | -1.39   | 0.16    |                       |
| Preuss et al. (2003)         | Age              | Age (continuous)                            | Suicide Attempt | 0.95                      | 0.91        | 0.99        | -2.39   | 0.02    |                       |
| Ramchand et al. (2008)       | Race & Ethnicity | American Indian (vs. white)                 | Suicide Attempt | 0.95                      | 0.14        | 6.57        | -0.05   | 0.96    |                       |
| Ramchand et al. (2008)       | Race & Ethnicity | Hispanic (vs. white)                        | Suicide Attempt | 0.87                      | 0.22        | 3.42        | -0.20   | 0.84    |                       |
| Ramchand et al. (2008)       | Race & Ethnicity | Other ethnicity (vs. white)                 | Suicide Attempt | 1.19                      | 0.51        | 2.79        | 0.40    | 0.69    |                       |
| Riihimaki et al. (2013)      | Age              | Age (continuous)                            | Suicide Attempt | 0.97                      | 0.93        | 1.01        | -1.45   | 0.15    |                       |
| Riihimaki et al. (2013)      | Gender           | Male (vs. female)                           | Suicide Attempt | 0.48                      | 0.10        | 2.28        | -0.92   | 0.36    |                       |
| Robinson et al. (2010)       | Gender           | Male (vs. female)                           | Suicide Attempt | 1.33                      | 0.70        | 2.55        | 0.87    | 0.38    |                       |
| Sadeh & McNeil (2013)        | Age              | Age (continuous)                            | Suicide Attempt | 1.24                      | 0.96        | 1.61        | 1.64    | 0.10    |                       |
| Sanchez-Gistau et al. (2013) | SES              | SES (increasing categories)                 | Suicide Attempt | 0.90                      | 0.52        | 1.57        | -0.37   | 0.71    |                       |
| Sher et al. (2006)           | Education Level  | Education (cont years)                      | Suicide Attempt | 1.75                      | 0.34        | 9.15        | 0.67    | 0.51    |                       |
| Sher et al. (2006)           | Gender           | Male (vs. female)                           | Suicide Attempt | 0.75                      | 0.12        | 4.62        | -0.31   | 0.76    |                       |
| Skeem et al. (2006)          | SES              | High SES (vs. other)                        | Suicide Attempt | 0.71                      | 0.41        | 1.24        | -1.20   | 0.23    |                       |
| Tejedor et al. (1999-1)      | Employment       | Employed                                    | Suicide Attempt | 0.51                      | 0.23        | 1.13        | -1.65   | 0.10    |                       |
| Tejedor et al. (1999-1)      | Gender           | Male (vs. female)                           | Suicide Attempt | 1.33                      | 0.62        | 2.84        | 0.73    | 0.47    |                       |
| Thompson & Light (2011)      | Gender           | Male (vs. female)                           | Suicide Attempt | 0.42                      | 0.27        | 0.65        | -3.94   | 0.00    |                       |
| Thompson & Light (2011)      | Location         | Urbanicity                                  | Suicide Attempt | 0.97                      | 0.65        | 1.44        | -0.15   | 0.88    |                       |
| Thompson et al. (2007)       | Age              | Age (12-14 vs. 15-17)                       | Suicide Attempt | 0.62                      | 0.43        | 0.90        | -2.54   | 0.01    |                       |
| Thompson et al. (2007)       | Gender           | Male (vs. female)                           | Suicide Attempt | 2.01                      | 1.29        | 3.12        | 3.11    | 0.00    |                       |
| Thompson et al. (2007)       | Location         | Urban (vs. rural)                           | Suicide Attempt | 1.10                      | 0.72        | 1.69        | 0.43    | 0.66    |                       |
| Waem et al. (2010)           | Age              | Age (continuous)                            | Suicide Attempt | 1.03                      | 1.00        | 1.06        | 2.02    | 0.04    |                       |
| Wedig et al. (2012)          | Age              | Age (continuous)                            | Suicide Attempt | 1.05                      | 1.03        | 1.07        | 5.02    | 0.00    |                       |
| Whitlock et al. (2013)       | Race & Ethnicity | Asian (vs. white)                           | Suicide Attempt | 1.20                      | 0.69        | 2.08        | 0.65    | 0.52    |                       |
| Whitlock et al. (2013)       | Race & Ethnicity | Black (vs. white)                           | Suicide Attempt | 3.20                      | 1.78        | 5.74        | 3.90    | 0.00    |                       |
| Whitlock et al. (2013)       | Race & Ethnicity | Hispanic (vs. white)                        | Suicide Attempt | 0.50                      | 0.10        | 2.50        | -0.84   | 0.40    |                       |
| Whitlock et al. (2013)       | Race & Ethnicity | Other ethnicity (vs. white)                 | Suicide Attempt | 1.20                      | 0.69        | 2.08        | 0.65    | 0.52    |                       |
| Whitlock et al. (2013)       | SES              | SES (cont increasing)                       | Suicide Attempt | 1.00                      | 0.99        | 1.01        | 0.00    | 1.00    |                       |
| Wichstrom (2000)             | Family Types     | Living with both parents                    | Suicide Attempt | 0.61                      | 0.46        | 0.81        | -3.40   | 0.00    |                       |
| Yaseen et al. (2013)         | Age              | Age (30-44 vs. 18-29)                       | Suicide Attempt | 1.31                      | 0.76        | 2.25        | 0.98    | 0.33    |                       |
| Yaseen et al. (2013)         | Age              | Age (45-64 vs. 18-29)                       | Suicide Attempt | 0.65                      | 0.33        | 1.28        | -1.25   | 0.21    |                       |
| Yaseen et al. (2013)         | Age              | Age (65+ vs. 18-29)                         | Suicide Attempt | 0.12                      | 0.02        | 0.71        | -2.33   | 0.02    |                       |
| Yaseen et al. (2013)         | Race & Ethnicity | Black (vs. white)                           | Suicide Attempt | 0.91                      | 0.42        | 1.97        | -0.24   | 0.81    |                       |
| Yaseen et al. (2013)         | Education Level  | Education (very high vs. low)               | Suicide Attempt | 0.29                      | 0.08        | 1.03        | -1.92   | 0.05    |                       |
| Yaseen et al. (2013)         | Race & Ethnicity | Hispanic (vs. white)                        | Suicide Attempt | 1.31                      | 0.66        | 2.61        | 0.77    | 0.44    |                       |
| Yaseen et al. (2013)         | Race & Ethnicity | Other ethnicity (vs. white)                 | Suicide Attempt | 1.82                      | 0.82        | 4.05        | 1.47    | 0.14    |                       |
| Yaseen et al. (2013)         | Location         | Suburban (vs. rural)                        | Suicide Attempt | 0.79                      | 0.41        | 1.52        | -0.71   | 0.48    |                       |
| Yaseen et al. (2013)         | Location         | Urban (vs. rural)                           | Suicide Attempt | 0.77                      | 0.39        | 1.53        | -0.75   | 0.46    |                       |
|                              |                  |                                             |                 | 0.98                      | 0.95        | 1.01        | -1.48   | 0.14    |                       |



## Protective Factors - Suicide Death

| Study                         | Comparison       | Predictor                                   | Outcome       | Statistics for each study |             |             |         |         |
|-------------------------------|------------------|---------------------------------------------|---------------|---------------------------|-------------|-------------|---------|---------|
|                               |                  |                                             |               | Odds ratio                | Lower limit | Upper limit | Z-Value | p-Value |
| Agerbo et al. (2005)          | Education Level  | Graduate school degree (vs. primary school) | Suicide Death | 0.71                      | 0.64        | 0.79        | -6.38   | 0.00    |
| Beck & Steer (1989)           | Employment       | Employed                                    | Suicide Death | 0.28                      | 0.06        | 1.29        | -1.63   | 0.10    |
| Beck, Steer, & Trexler (1989) | Gender           | Female (vs. male)                           | Suicide Death | 1.73                      | 0.64        | 4.64        | 1.09    | 0.28    |
| Berglund & Nilsson (1987)     | Gender           | Female (vs. male)                           | Suicide Death | 1.16                      | 0.75        | 1.79        | 0.65    | 0.52    |
| Britton et al. (2012-Month)   | Age              | Age (18-34 vs. 75)                          | Suicide Death | 1.24                      | 0.36        | 4.27        | 0.34    | 0.73    |
| Britton et al. (2012-Month)   | Age              | Age (35-54 vs. 75)                          | Suicide Death | 0.85                      | 0.47        | 1.53        | -0.54   | 0.59    |
| Britton et al. (2012-Month)   | Age              | Age (55-74 vs. 75)                          | Suicide Death | 0.77                      | 0.49        | 1.21        | -1.12   | 0.26    |
| Brown et al. (2005)           | Gender           | Female (vs. male)                           | Suicide Death | 2.34                      | 1.10        | 4.98        | 2.21    | 0.03    |
| Coryell & Schlessler (2001)   | Gender           | Female (vs. male)                           | Suicide Death | 1.15                      | 0.50        | 2.61        | 0.33    | 0.75    |
| Cullberg et al. (1988)        | Age              | Age (18-24 vs older)                        | Suicide Death | 0.21                      | 0.01        | 3.68        | -1.07   | 0.29    |
| Dahlsgaard et al. (1998)      | Education Level  | College (vs. not)                           | Suicide Death | 1.27                      | 0.33        | 4.87        | 0.34    | 0.73    |
| Dahlsgaard et al. (1998)      | Employment       | Employed/Student (vs. not)                  | Suicide Death | 0.09                      | 0.02        | 0.45        | -2.91   | 0.00    |
| Dahlsgaard et al. (1998)      | Gender           | Female (vs. male)                           | Suicide Death | 1.00                      | 0.26        | 3.92        | 0.00    | 1.00    |
| Gradus et al. (2012)          | SES              | SES (very high)                             | Suicide Death | 0.39                      | 0.29        | 0.52        | -6.34   | 0.00    |
| Leadholm et al. (2014)        | Education Level  | Education above public school (vs. below)   | Suicide Death | 1.10                      | 1.00        | 1.20        | 2.05    | 0.04    |
| Nordstrom et al. (1995)       | Age              | Age (less vs. greater than 35)              | Suicide Death | 0.79                      | 0.51        | 1.22        | -1.07   | 0.29    |
| Qin et al. (2003)             | Employment       | Full-time student                           | Suicide Death | 1.57                      | 1.36        | 1.81        | 6.19    | 0.00    |
| Sani et al. (2011)            | Gender           | Female (vs. male)                           | Suicide Death | 1.00                      | 0.61        | 1.64        | 0.00    | 1.00    |
| Sani et al. (2011)            | Education Level  | More than 8 years education (vs. less)      | Suicide Death | 0.93                      | 0.48        | 1.80        | -0.23   | 0.82    |
| Smith et al. (1992)           | Race & Ethnicity | Black (vs. all other races)                 | Suicide Death | 0.85                      | 0.60        | 1.21        | -0.91   | 0.36    |
| Tejedor et al. (1999-2)       | Employment       | Employed                                    | Suicide Death | 0.40                      | 0.13        | 1.23        | -1.59   | 0.11    |
| Turvey et al. (2002)          | Race & Ethnicity | Black (vs. other)                           | Suicide Death | 0.72                      | 0.24        | 2.16        | -0.58   | 0.56    |
| Turvey et al. (2002)          | Education Level  | Education (cont years)                      | Suicide Death | 0.98                      | 0.87        | 1.10        | -0.34   | 0.74    |
| Turvey et al. (2002)          | Race & Ethnicity | Other ethnicity (vs. white)                 | Suicide Death | 5.00                      | 0.22        | 114.56      | 1.01    | 0.31    |
| Turvey et al. (2002)          | Family Types     | Presence of a spouse                        | Suicide Death | 0.36                      | 0.12        | 1.05        | -1.86   | 0.06    |
| Wenzel et al. (2011)          | Age              | Age (30+ vs. older)                         | Suicide Death | 1.61                      | 1.06        | 2.44        | 2.23    | 0.03    |
| Wenzel et al. (2011)          | Education Level  | Education (no high school vs. other)        | Suicide Death | 1.64                      | 1.08        | 2.48        | 2.30    | 0.02    |
|                               |                  |                                             |               | 0.94                      | 0.78        | 1.12        | -0.72   | 0.47    |
